# Supplementary material for: The behaviour and activity budgets of two sympatric sloths; Bradypus variegatus and Choloepus hoffmanni
Source: PeerJ journal article supplement (doi:10.7717/peerj.15430), 2023-05-29

a) Sleeping

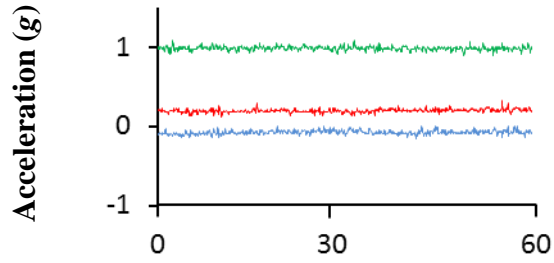

b). Resting

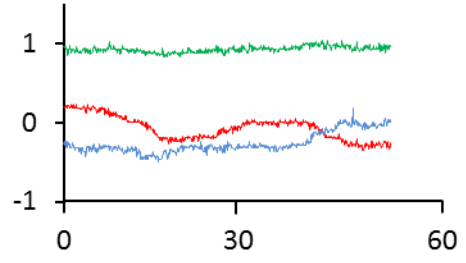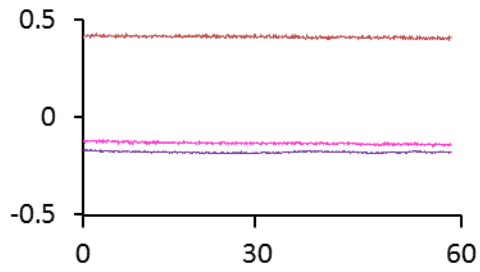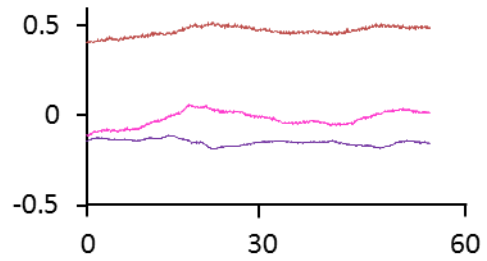

Time (s)

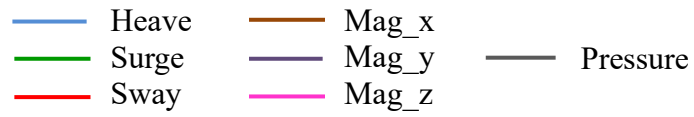

Supplement: Figure_S3.pdf [file Figure_S3.pdf]
