# Supplementary material for: The behaviour and activity budgets of two sympatric sloths; Bradypus variegatus and Choloepus hoffmanni
Source: PeerJ journal article supplement (doi:10.7717/peerj.15430), 2023-05-29

**Animal  
ch3:**

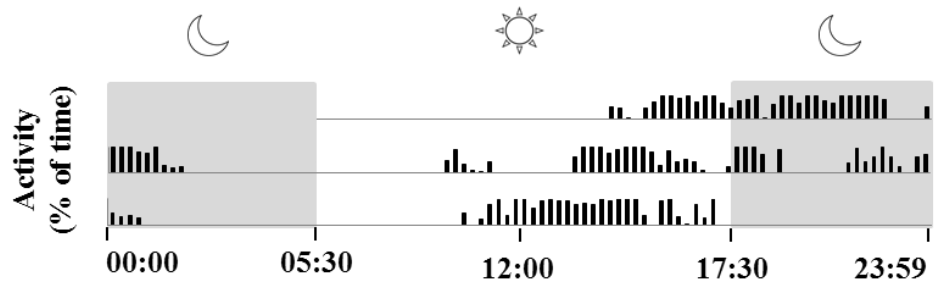

Supplement: Figure_S14.pdf [file Figure_S14.pdf]
